# Supplementary material for: Comparative Analyses of Fundamental Differences in Membrane Transport Capabilities in Prokaryotes and Eukaryotes
Source: PLOS journal article supplement (doi:10.1371/journal.pcbi.0010027), 2005-08-18
Supplement: S1 (10.1371/journal.pcbi.0010027.s001) [file journal.pcbi.0010027.s001]

|  | **Taxonomy** | **Species** |
| --- | --- | --- |
| **Archaea** | Crenarchaeota | *Aeropyrum pernix K1* |
| *Pyrobaculum aerophilum IM2* |
| *Sulfolobus solfataricus P2* |
| *Sulfolobus tokodaii strain7* |
| Euryarchaeota | *Archaeoglobus fulgidus DSM4304* |
| *Halobacterium sp. NRC-1* |
| *Methanobacterium thermoautotrophicum deltaH* |
| *Methanococcus jannaschii DSM* |
| *Methanopyrus kandleri AV19* |
| *Methanosarcina acetivorans C2A* |
| *Methanosarcina mazei Goe1* |
| *Pyrococcus abyssi GE5* |
| *Pyrococcus furiosus DSM3638* |
| *Pyrococcus horikoshii OT3* |
| *Thermoplasma acidophilum DSM1728* |
| *Thermoplasma volcanium GSS1* |
| Nanoarchaea | *Nanoarchaeum equitans Kin4-M* |
| **Eubacteria** | Actinobacteria | *Bifidobacterium longum NCC2705* |
| *Corynebacterium efficiens YS-314* |
| *Corynebacterium glutamicum ATCC13032* |
| *Mycobacterium leprae TN* |
| *Mycobacterium tuberculosis H37Rv* |
| *Mycobacterium avium K-10* |
| *Mycobacterium bovis AF2122/97* |
| *Streptomyces avermitilis MA-4680* |
| *Streptomyces coelicolor A3(2)* |
| *Tropheryma whipplei Twist* |
| *Corynebacterium diphtheriae NCTC13129* |
| *Tropheryma whippelii TW08/27* |
| Aquificae | *Aquifex aeolicus VF5* |
| Bacteroidetes | *Bacteroides thetaiotaomicron VPI-5482* |
| *Chlorobium tepidum TLS* |
| Chlamydia | *Chlamydia muridarum Nigg* |
| *Chlamydia pneumoniae AR39* |
| *Chlamydia trachomatis serovarD* |
| *Chlamydophila caviae GPIC* |
| *Chlamydophila pneumoniae TW-183* |
| Cyanobacteria | *Gloeobacter violaceus PCC7421* |
| *Nostoc sp. PCC7120* |
| *Prochlorococcus marinus MIT9313* |
| *Prochlorococcus marinus SS120(CCMP1375)* |
| *Prochlorococcus marinus MED4(CCMP1378)* |
| *Synechococcus sp. WH8102* |
| **Eubacteria** | *Synechocystis sp. PCC6803* |
| *Thermosynechococcus elongatus BP-1* |
| Deinococcus-Thermus | *Deinococcus radiodurans R1* |
| Firmicutes | *Bacillus anthracis Ames* |
| *Bacillus cereus ATCC14579* |
| *Bacillus halodurans C-125* |
| *Bacillus subtilis 168* |
| *Clostridium acetobutylicum ATCC824* |
| *Bacillus anthracis A2012* |
| *Clostridium perfringens 13* |
| *Clostridium tetani E88* |
| *Enterococcus faecalis V583* |
| *Lactobacillus plantarum WCFS1* |
| *Lactobacillus johnsonii NCC533* |
| *Lactococcus lactis IL1403* |
| *Listeria innocua Clip11262(rhamnose-negative)* |
| *Listeria monocytogenes EGD-e* |
| *Mycoplasma gallisepticum R* |
| *Mycoplasma genitalium G-37* |
| *Mycoplasma penetrans HF-2* |
| *Mycoplasma pneumoniae M129* |
| *Mycoplasma pulmonis UAB CTIP* |
| *Oceanobacillus iheyensis HTE831* |
| *Phytoplasma onion yellows YJ016* |
| *Staphylococcus aureus N315* |
| *Staphylococcus epidermidis ATCC12228* |
| *Streptococcus agalactiae 2603V/R* |
| *Streptococcus agalactiae NEM316* |
| *Streptococcus mutans UAB159* |
| *Streptococcus pneumoniae TIGR4* |
| *Streptococcus pyogenes M1* |
| *Thermoanaerobacter tengcongensis MB4* |
| *Ureaplasma urealyticum serovar3* |
| Fusobacteria | *Fusobacterium nucleatum ATCC25586* |
| Planctomycetes | *Pirellula sp. 1* |
| Proteobacteria-Alpha | *Agrobacterium tumefaciens C58* |
| *Bradyrhizobium japonicum USDA110* |
| *Brucella melitensis 16M* |
| *Brucella suis 1330* |
| *Caulobacter crescentus CB15* |
| *Mesorhizobium loti MAFF303099* |
| *Rickettsia conorii Malish7* |
| *Rickettsia prowazekii MadridE* |
| *Sinorhizobium meliloti 1021* |
| **Eubacteria** | *Wolbachia sp.* |
| Proteobacteria-Beta | *Bordetella bronchiseptica RB50 NCTC-13252* |
| *Bordetella parapertussis 12822 NCTC-13253* |
| *Bordetella pertussis Tohama I NCTC-13251* |
| *Neisseria meningitidis MC58* |
| *Nitrosomonas europaea ATCC19718* |
| *Ralstonia solanacearum GMI1000* |
| Proteobacteria-Delta | *Bdellovibrio bacteriovorus HD100* |
| *Geobacter sulfurreducens PCA* |
| Proteobacteria-Epsilon | *Campylobacter jejuni NCTC11168* |
| *Helicobacter pylori 26695* |
| *Helicobacter hepaticus ATCC51449* |
| *Wolinella succinogenes* |
| Proteobacteria-Gamma | *Buchnera aphidicola Sg* |
| *Buchnera sp. APS* |
| *Candidatus Blochmannia floridanus* |
| *Coxiella burnetii RSA493* |
| *Escherichia coli K12-MG1655* |
| *Escherichia coli O157:H7 EDL933* |
| *Haemophilus influenzae KW20* |
| *Haemophilus ducreyi 35000HP* |
| *Pasteurella multocida Pm70* |
| *Photorhabdus lumines laumondii TTO1* |
| *Pseudomonas aeruginosa PAO1* |
| *Pseudomonas putida KT2440* |
| *Pseudomonas syringae pv. tomato DC3000* |
| *Rhodopseudomonas palustris CGA009* |
| *Salmonella typhi CT18* |
| *Salmonella typhimurium LT2* |
| *Shewanella oneidensis MR-1* |
| *Shigella flexneri 2a 301* |
| *Vibrio cholerae El Tor N16961* |
| *Vibrio parahaemolyticus RIMD2210633* |
| *Vibrio vulnificus CMCP6* |
| *Vibrio vulnificus YJ016* |
| *Wigglesworthia brevipalpis P-endosymbiont* |
| *Xanthomonas axonopodis pv. citri 306* |
| *Xylella fastidiosa 9a5c* |
| *Xylella fastidiosa Temecula1* |
| *Yersinia pestis CO-92* |
| Spirochaetes | *Borrelia burgdorferi B31* |
| *Leptospira interrogans serovar lai56601* |
| *Treponema denticola ATCC35405* |
| *Treponema pallidum Nichols* |
| Thermotogales | *Thermotoga maritima MSB8* |
| **Eukaryota** | Fungi | *Neurospora crassa 74-OR23-IVA* |
| *Saccharomyces cerevisiae S288C* |
| *Schizosaccharomyces pombe* |
| Insects | *Drosophila melanogaster* |
| Microsporidia | *Encephalitozoon cuniculi* |
| Nematodes | *Caenorhabditis elegans* |
| Plants | *Arabidopsis thaliana* |
| Primates | *Homo sapiens* |
| Protozoa | *Plasmodium falciparum 3D7* |
